# Supplementary material
Source: PubMed Central journal article supplement (PMC7572761)
Supplement: NIHMS1628787-supplement-1.pdf [file NIHMS1628787-supplement-1.pdf]

# Supplementary Information

## Title:

27-Hydroxycholesterol acts on myeloid immune cells to induce T cell dysfunction, promoting breast cancer progression.

## Authors:

Liqian Ma<sup>1</sup>, Lawrence Wang<sup>2,3</sup>, Adam T. Nelson, Chaeyeon Han<sup>1</sup>, Sisi He<sup>1</sup>, Madeline A. Henn<sup>1</sup>, Karan Menon<sup>1</sup>, Joy J. Chen<sup>1</sup>, Amy E. Baek<sup>1,§</sup>, Anna Vardanyan<sup>1</sup>, Sayyed Hamed Shahoei, Sunghee Park<sup>4</sup>, David J. Shapiro<sup>2,5,6</sup>, Som G. Nanjappa<sup>7</sup>, and Erik R. Nelson<sup>1,5,6,8\*</sup>

## Affiliations:

<sup>1</sup>Department of Molecular and Integrative Physiology, University of Illinois Urbana-Champaign, Urbana, IL

<sup>2</sup>Department of Biochemistry, University of Illinois Urbana-Champaign, Urbana, IL

<sup>3</sup>University of Illinois College of Medicine, University of Illinois Urbana-Champaign, Urbana, IL

<sup>4</sup>Department of Pharmacology and Cancer Biology, Duke University School of Medicine, Durham, NC

<sup>5</sup>Cancer Center at Illinois, University of Illinois Urbana-Champaign, Urbana, IL

<sup>6</sup>University of Illinois Cancer Center, University of Illinois at Chicago, Chicago, IL

<sup>7</sup>Department of Pathobiology, University of Illinois Urbana-Champaign, Urbana, IL

<sup>8</sup>Carl R. Woese Institute for Genomic Biology, Anticancer Discovery from Pets to People Theme, University of Illinois Urbana-Champaign, Urbana, IL

§ Current Affiliation: Department of Bioengineering, University of Illinois Urbana-Champaign, Urbana, IL

\*To whom correspondence and reprint requests should be addressed: Erik R. Nelson. University of Illinois at Urbana-Champaign. 407 S Goodwin Ave (MC-114), Urbana, IL, 61801. Phone: 217-244-5477. Fax: 217-333-1133. E-mail: [enels@illinois.edu](mailto:enels@illinois.edu)

**Running Head:** cholesterol metabolite works on myeloid cells to impair T cells.

Supplemental Table 1a. Cytokine secretion of macrophages under two time points after Veh or 27HC treatment only.

| 24hrs post treatment |           |                        |      |        | 72hrs post co-culture |                       |      |        |
|----------------------|-----------|------------------------|------|--------|-----------------------|-----------------------|------|--------|
| Cytokine             | Treatment | Average Concentration* | SEM  | FDR    | Treatment             | Average Concentration | SEM  | FDR    |
| ENA-78               | Veh       | out of range           | NA   | NA     | Veh                   | 3.46                  | 0.85 | NA     |
| ENA-78               | 27HC      | out of range           | NA   |        | 27HC                  | out of range          | NA   |        |
| Eotaxin              | Veh       | out of range           | NA   | NA     | Veh                   | out of range          | NA   | NA     |
| Eotaxin              | 27HC      | out of range           | NA   |        | 27HC                  | out of range          | NA   |        |
| G-CSF                | Veh       | out of range           | NA   | NA     | Veh                   | 0.79                  | 0.2  | 0.7898 |
| G-CSF                | 27HC      | 0.58                   | 0.1  |        | 27HC                  | 0.97                  | 0.05 |        |
| GM-CSF               | Veh       | out of range           | NA   | NA     | Veh                   | out of range          | NA   | NA     |
| GM-CSF               | 27HC      | out of range           | NA   |        | 27HC                  | out of range          | NA   |        |
| GRO-alpha            | Veh       | 99.19                  | 1.81 | 0.9820 | Veh                   | 109.46                | 3.48 | 0.0169 |
| GRO-alpha            | 27HC      | 99.49                  | 7.93 |        | 27HC                  | 69.8                  | 2.89 |        |
| IFN-a                | Veh       | 12.48                  | 2.04 | 0.5984 | Veh                   | 15.43                 | 1.8  | 0.8713 |
| IFN-a                | 27HC      | 15.64                  | 1.59 |        | 27HC                  | 14.17                 | 2.49 |        |
| IFN-g                | Veh       | out of range           | NA   | NA     | Veh                   | out of range          | NA   | NA     |
| IFN-g                | 27HC      | out of range           | NA   |        | 27HC                  | out of range          | NA   |        |
| IL-10                | Veh       | 2.65                   | 0.58 | 0.4249 | Veh                   | 1.76                  | 0.54 | 0.9053 |
| IL-10                | 27HC      | 4.89                   | 1.07 |        | 27HC                  | 1.63                  | 0.15 |        |
| IL-12p70             | Veh       | out of range           | NA   | NA     | Veh                   | out of range          | NA   | NA     |
| IL-12p70             | 27HC      | out of range           | NA   |        | 27HC                  | out of range          | NA   |        |
| IL-13                | Veh       | out of range           | NA   | NA     | Veh                   | out of range          | NA   | NA     |
| IL-13                | 27HC      | out of range           | NA   |        | 27HC                  | out of range          | NA   |        |
| IL-15                | Veh       | out of range           | NA   | NA     | Veh                   | out of range          | NA   | NA     |
| IL-15                | 27HC      | out of range           | NA   |        | 27HC                  | out of range          | NA   |        |
| IL-17A               | Veh       | 0.65                   | 0.05 | 0.3276 | Veh                   | 1.08                  | 0.25 | 0.4097 |
| IL-17A               | 27HC      | 1.84                   | 0.42 |        | 27HC                  | 1.65                  | 0.09 |        |
| IL-18                | Veh       | out of range           | NA   | NA     | Veh                   | out of range          | NA   | NA     |
| IL-18                | 27HC      | out of range           | NA   |        | 27HC                  | out of range          | NA   |        |
| IL-1a                | Veh       | out of range           | NA   | NA     | Veh                   | out of range          | NA   | NA     |

| 24hrs post treatment |           |                        |       |        | 72hrs post co-culture |                       |      |        |
|----------------------|-----------|------------------------|-------|--------|-----------------------|-----------------------|------|--------|
| Cytokine             | Treatment | Average Concentration* | SEM   | FDR    | Treatment             | Average Concentration | SEM  | FDR    |
| IL-1a                | 27HC      | out of range           | NA    |        | 27HC                  | out of range          | NA   |        |
| IL-1b                | Veh       | out of range           | NA    | NA     | Veh                   | out of range          | NA   | NA     |
| IL-1b                | 27HC      | out of range           | NA    |        | 27HC                  | out of range          | NA   |        |
| IL-2                 | Veh       | out of range           | NA    | NA     | Veh                   | out of range          | NA   | NA     |
| IL-2                 | 27HC      | out of range           | NA    |        | 27HC                  | out of range          | NA   |        |
| IL-22                | Veh       | out of range           | NA    | NA     | Veh                   | out of range          | NA   | NA     |
| IL-22                | 27HC      | out of range           | NA    |        | 27HC                  | out of range          | NA   |        |
| IL-23                | Veh       | out of range           | NA    | NA     | Veh                   | out of range          | NA   | NA     |
| IL-23                | 27HC      | out of range           | NA    |        | 27HC                  | out of range          | NA   |        |
| IL-27                | Veh       | 0.49                   | 0.17  | NA     | Veh                   | 0.45                  | 0.08 | 0.5474 |
| IL-27                | 27HC      | 0.76                   | 0.14  |        | 27HC                  | 0.61                  | 0.08 |        |
| IL-28                | Veh       | out of range           | NA    | NA     | Veh                   | out of range          | NA   | NA     |
| IL-28                | 27HC      | out of range           | NA    |        | 27HC                  | out of range          | NA   |        |
| IL-3                 | Veh       | out of range           | NA    | NA     | Veh                   | out of range          | NA   | NA     |
| IL-3                 | 27HC      | out of range           | NA    |        | 27HC                  | out of range          | NA   |        |
| IL-31                | Veh       | out of range           | NA    | NA     | Veh                   | 6.07                  | 1.06 | NA     |
| IL-31                | 27HC      | out of range           | NA    |        | 27HC                  | 6.39                  | 0.74 |        |
| IL-4                 | Veh       | out of range           | NA    | NA     | Veh                   | out of range          | NA   | NA     |
| IL-4                 | 27HC      | out of range           | NA    |        | 27HC                  | out of range          | NA   |        |
| IL-5                 | Veh       | out of range           | NA    | NA     | Veh                   | out of range          | NA   | NA     |
| IL-5                 | 27HC      | out of range           | NA    |        | 27HC                  | out of range          | NA   |        |
| IL-6                 | Veh       | out of range           | NA    | NA     | Veh                   | 1.29                  | 0.57 | NA     |
| IL-6                 | 27HC      | 7.76                   | 2.81  |        | 27HC                  | 1.03                  | 0.42 |        |
| IL-9                 | Veh       | out of range           | NA    | NA     | Veh                   | out of range          | NA   | NA     |
| IL-9                 | 27HC      | out of range           | NA    |        | 27HC                  | out of range          | NA   |        |
| IP-10                | Veh       | 192.42                 | 13.49 | 0.5474 | Veh                   | 104.84                | 15.2 | 0.4011 |
| IP-10                | 27HC      | 147.53                 | 26.31 |        | 27HC                  | 69.28                 | 4.98 |        |

| 24hrs post treatment |           |                        |       |        | 72hrs post co-culture |                       |      |        |
|----------------------|-----------|------------------------|-------|--------|-----------------------|-----------------------|------|--------|
| Cytokine             | Treatment | Average Concentration* | SEM   | FDR    | Treatment             | Average Concentration | SEM  | FDR    |
| LIF                  | Veh       | 2.13                   | 0.55  | 0.7898 | Veh                   | 5.37                  | 0.05 | NA     |
| LIF                  | 27HC      | 2.6                    | 0.16  |        | 27HC                  | 5.29                  | 0.27 |        |
| M-CSF                | Veh       | out of range           | NA    | NA     | Veh                   | out of range          | NA   | NA     |
| M-CSF                | 27HC      | out of range           | NA    |        | 27HC                  | out of range          | NA   |        |
| MCP-1                | Veh       | 91.16                  | 10.89 | 0.1965 | Veh                   | 33.07                 | 3.49 | 0.1306 |
| MCP-1                | 27HC      | 196.22                 | 28.23 |        | 27HC                  | 16.51                 | 3.21 |        |
| MCP-3                | Veh       | 77.84                  | 7.56  | 0.2824 | Veh                   | 152.97                | 8.23 | 0.1335 |
| MCP-3                | 27HC      | 114.25                 | 12.78 |        | 27HC                  | 91.99                 | 13.8 |        |
| MIP-1a               | Veh       | 4.39                   | 0.12  | 0.0156 | Veh                   | 3.16                  | 0.05 | 0.8595 |
| MIP-1a               | 27HC      | 6.49                   | 0.09  |        | 27HC                  | 3.22                  | 0.1  |        |
| MIP-1b               | Veh       | 38.27                  | 1.77  | 0.0279 | Veh                   | 27.17                 | 0.86 | 0.8392 |
| MIP-1b               | 27HC      | 62.35                  | 2.55  |        | 27HC                  | 27.76                 | 0.24 |        |
| MIP-2                | Veh       | 519.17                 | 23.68 | 0.3009 | Veh                   | 284.96                | 7.8  | NA     |
| MIP-2                | 27HC      | 604.1                  | 29.96 |        | 27HC                  | 191.19                | 6.02 |        |
| RANTES               | Veh       | 23.3                   | 2.25  | 0.2409 | Veh                   | 24.32                 | 1.39 | 0.0634 |
| RANTES               | 27HC      | 15.47                  | 2.25  |        | 27HC                  | 10.81                 | 0.45 |        |
| TNF-a                | Veh       | 32.95                  | 2.88  | 0.6104 | Veh                   | 15.76                 | 0.23 | NA     |
| TNF-a                | 27HC      | 39.88                  | 5.14  |        | 27HC                  | 15.13                 | 0.73 |        |

\*concentration as pg/ml

Supplemental Table 1B. Cytokine secretion of macrophages under two time points after LPS and Veh or 27HC treatment.

| 24hrs post treatment |           |                        |        |        | 72hrs post co-culture |                       |       |        |
|----------------------|-----------|------------------------|--------|--------|-----------------------|-----------------------|-------|--------|
| Cytokine             | Treatment | Average Concentration* | SEM    | FDR    | Treatment             | Average Concentration | SEM   | FDR    |
| ENA-78               | Veh       | 174.47                 | 12.86  | 0.8598 | Veh                   | 69.14                 | 4.59  | 0.7990 |
| ENA-78               | 27HC      | 182.74                 | 11.45  |        | 27HC                  | 84.88                 | 19.94 |        |
| Eotaxin              | Veh       | out of range           | NA     | NA     | Veh                   | out of range          | NA    | NA     |
| Eotaxin              | 27HC      | out of range           | NA     |        | 27HC                  | out of range          | NA    |        |
| G-CSF                | Veh       | 5.34                   | 0.61   | 0.9053 | Veh                   | 3.92                  | 0.43  | 0.5474 |
| G-CSF                | 27HC      | 5.71                   | 1.08   |        | 27HC                  | 3.06                  | 0.39  |        |
| GM-CSF               | Veh       | 7.92                   | 0.28   | NA     | Veh                   | out of range          | NA    | NA     |
| GM-CSF               | 27HC      | 8.18                   | 0.44   |        | 27HC                  | out of range          | NA    |        |
| GRO-alpha            | Veh       | 1993.92                | 119.05 | 0.2409 | Veh                   | 566.87                | 31.96 | 0.2409 |
| GRO-alpha            | 27HC      | 1614.83                | 55.72  |        | 27HC                  | 847.87                | 86.06 |        |
| IFN-a                | Veh       | 15.38                  | 4.05   | 0.5984 | Veh                   | 15.98                 | 2.48  | 0.9105 |
| IFN-a                | 27HC      | 21.24                  | 0.03   |        | 27HC                  | 16.62                 | 3.16  |        |
| IFN-g                | Veh       | 4.29                   | 0.45   | 0.1095 | Veh                   | 0.84                  | 0.47  | 0.6104 |
| IFN-g                | 27HC      | 1.61                   | 0.17   |        | 27HC                  | 0.22                  | 0.05  |        |
| IL-10                | Veh       | 1058.73                | 18.36  | NA     | Veh                   | 21.79                 | 1.53  | 0.5984 |
| IL-10                | 27HC      | 1052.2                 | 13.84  |        | 27HC                  | 18.65                 | 2.08  |        |
| IL-12p70             | Veh       | 6.83                   | 0.25   | NA     | Veh                   | 0.7                   | 0.18  | 0.8713 |
| IL-12p70             | 27HC      | 6.98                   | 0.15   |        | 27HC                  | 0.92                  | 0.54  |        |
| IL-13                | Veh       | 2.95                   | 0.03   | 0.6104 | Veh                   | 0.92                  | 0.09  | 0.6769 |
| IL-13                | 27HC      | 3.04                   | 0.06   |        | 27HC                  | 1.16                  | 0.22  |        |
| IL-15                | Veh       | 26.45                  | 0.9    | 0.5474 | Veh                   | 13.43                 | 0.37  | 0.1095 |
| IL-15                | 27HC      | 24.73                  | 0.89   |        | 27HC                  | 10.78                 | 0.5   |        |
| IL-17A               | Veh       | 14.08                  | 0.95   | 0.9820 | Veh                   | 2.89                  | 0.51  | NA     |
| IL-17A               | 27HC      | 14.12                  | 1.19   |        | 27HC                  | 3.33                  | 0.93  |        |
| IL-18                | Veh       | 879.91                 | 46.17  | 0.1260 | Veh                   | 212.34                | 8.59  | 0.0674 |
| IL-18                | 27HC      | 1143.92                | 12.38  |        | 27HC                  | 144.8                 | 10.31 |        |
| IL-1a                | Veh       | 111.48                 | 7.24   | 0.0279 | Veh                   | 85.53                 | 3.38  | 0.1260 |
| IL-1a                | 27HC      | 238.05                 | 1.44   |        | 27HC                  | 105.1                 | 4.1   |        |

| 24hrs post treatment |           |                        |        |        | 72hrs post co-culture |                       |       |        |
|----------------------|-----------|------------------------|--------|--------|-----------------------|-----------------------|-------|--------|
| Cytokine             | Treatment | Average Concentration* | SEM    | FDR    | Treatment             | Average Concentration | SEM   | FDR    |
| IL-1b                | Veh       | 274.45                 | 6.14   | 0.0156 | Veh                   | 30.6                  | 0.7   | 0.0156 |
| IL-1b                | 27HC      | 378.89                 | 7.54   |        | 27HC                  | 11.18                 | 1.24  |        |
| IL-2                 | Veh       | out of range           | NA     | NA     | Veh                   | out of range          | NA    | NA     |
| IL-2                 | 27HC      | out of range           | NA     |        | 27HC                  | out of range          | NA    |        |
| IL-22                | Veh       | 176.97                 | 20.57  | 0.4249 | Veh                   | 46.84                 | 2.37  | NA     |
| IL-22                | 27HC      | 226.03                 | 19.66  |        | 27HC                  | 33.48                 | 2.27  |        |
| IL-23                | Veh       | 26.03                  | 3.01   | 0.8303 | Veh                   | 5.04                  | 2.2   | NA     |
| IL-23                | 27HC      | 23.87                  | 0.94   |        | 27HC                  | 1.16                  | 0.28  |        |
| IL-27                | Veh       | 141.61                 | 4.34   | NA     | Veh                   | 9.7                   | 0     | 0.1335 |
| IL-27                | 27HC      | 119.44                 | 4.31   |        | 27HC                  | 6.95                  | 0.48  |        |
| IL-28                | Veh       | 308.37                 | 34.4   | 0.9105 | Veh                   | 127.24                | 16.28 | 0.8595 |
| IL-28                | 27HC      | 300.85                 | 31.42  |        | 27HC                  | 99.97                 | 42.92 |        |
| IL-3                 | Veh       | out of range           | NA     | NA     | Veh                   | out of range          | NA    | NA     |
| IL-3                 | 27HC      | out of range           | NA     |        | 27HC                  | out of range          | NA    |        |
| IL-31                | Veh       | 17.72                  | 0.99   | NA     | Veh                   | 10.01                 | 1.12  | 0.8598 |
| IL-31                | 27HC      | 19.49                  | 0.84   |        | 27HC                  | 8.96                  | 1.6   |        |
| IL-4                 | Veh       | out of range           | NA     | NA     | Veh                   | out of range          | NA    | NA     |
| IL-4                 | 27HC      | out of range           | NA     |        | 27HC                  | out of range          | NA    |        |
| IL-5                 | Veh       | 7.69                   | 0.56   | 0.6769 | Veh                   | 4.16                  | 0.49  | NA     |
| IL-5                 | 27HC      | 8.43                   | 0.51   |        | 27HC                  | 3.26                  | 0.43  |        |
| IL-6                 | Veh       | 7600.34                | 164.28 | 0.0674 | Veh                   | 347.71                | 41.42 | NA     |
| IL-6                 | 27HC      | 5766.51                | 13.33  |        | 27HC                  | 368.53                | 32.73 |        |
| IL-9                 | Veh       | 28.88                  | 2.27   | NA     | Veh                   | out of range          | NA    | NA     |
| IL-9                 | 27HC      | 29.87                  | 3.82   |        | 27HC                  | out of range          | NA    |        |
| IP-10                | Veh       | 714.98                 | 31.69  | 0.8871 | Veh                   | 817.83                | 11.48 | NA     |
| IP-10                | 27HC      | 703.04                 | 13.19  |        | 27HC                  | 777.67                | 72.42 |        |
| LIF                  | Veh       | 17.01                  | 0.65   | 0.6464 | Veh                   | 8.88                  | 0.6   | 0.7898 |
| LIF                  | 27HC      | 17.97                  | 0.63   |        | 27HC                  | 9.67                  | 0.88  |        |
| M-CSF                | Veh       | 1.08                   | 0.02   | 0.8713 | Veh                   | 0.83                  | 0.11  | 0.4249 |
| M-CSF                | 27HC      | 1.07                   | 0.02   |        | 27HC                  | 0.6                   | 0.05  |        |

| 24hrs post treatment |           |                        |         |        | 72hrs post co-culture |                       |        |        |
|----------------------|-----------|------------------------|---------|--------|-----------------------|-----------------------|--------|--------|
| Cytokine             | Treatment | Average Concentration* | SEM     | FDR    | Treatment             | Average Concentration | SEM    | FDR    |
| MCP-1                | Veh       | 10177.69               | 1525.37 | NA     | Veh                   | 1508.6                | 21.21  | 0.1570 |
| MCP-1                | 27HC      | 9294.78                | 919.08  |        | 27HC                  | 1266.96               | 57.22  |        |
| MCP-3                | Veh       | 472                    | 23.77   | NA     | Veh                   | 312.62                | 7.3    | 0.9053 |
| MCP-3                | 27HC      | 483.91                 | 49.4    |        | 27HC                  | 315.95                | 14.05  |        |
| MIP-1a               | Veh       | 39.22                  | 0.51    | NA     | Veh                   | 4.54                  | 0.21   | 0.7508 |
| MIP-1a               | 27HC      | 31.39                  | 0.42    |        | 27HC                  | 5.17                  | 0.65   |        |
| MIP-1b               | Veh       | 684.83                 | 34.65   | 0.1350 | Veh                   | 16.94                 | 0.82   | 0.1350 |
| MIP-1b               | 27HC      | 538.14                 | 25.19   |        | 27HC                  | 30.42                 | 2.79   |        |
| MIP-2                | Veh       | 7852.33                | 241.26  | 0.6670 | Veh                   | 4145.43               | 330.06 | NA     |
| MIP-2                | 27HC      | 7462.6                 | 294.32  |        | 27HC                  | 3787.83               | 353.77 |        |
| RANTES               | Veh       | 679.87                 | 20.08   | 0.8084 | Veh                   | 620.1                 | 6.97   | 0.9187 |
| RANTES               | 27HC      | 661.36                 | 17.96   |        | 27HC                  | 625.15                | 34.76  |        |
| TNF-a                | Veh       | 1493.98                | 41.81   | NA     | Veh                   | 194.18                | 0.21   | NA     |
| TNF-a                | 27HC      | 1472.32                | 38.99   |        | 27HC                  | 196.34                | 10.98  |        |

\*concentration as pg/ml

Supplemental Table 2. LXR and/or ER ligands

| <b>Ligand</b>                | <b>Class</b>                                                      | <b>Documented Activity</b> | <b>Identified Activity</b> | <b>Literature</b>           |
|------------------------------|-------------------------------------------------------------------|----------------------------|----------------------------|-----------------------------|
| <b>4<math>\beta</math>HC</b> | oxysterol                                                         | LXR ligand                 | putative ER ligand         | [124]                       |
| <b>20(S)HC</b>               | oxysterol                                                         | LXR ligand                 |                            | [124, 125]                  |
| <b>22(R)HC</b>               | oxysterol                                                         | LXR ligand                 |                            | [124, 126, 133]             |
| <b>24(S)HC</b>               | oxysterol                                                         | LXR ligand                 |                            | [124, 126]                  |
| <b>25HC</b>                  | oxysterol                                                         | LXR ligand,<br>ER ligand   |                            | [124, 126, 128]             |
| <b>27HC</b>                  | oxysterol                                                         | LXR ligand,<br>ER ligand   |                            | [22, 108, 124, 129,<br>130] |
| <b>24, 25EC</b>              | oxysterol                                                         | LXR ligand                 |                            | [126]                       |
| <b>7KC</b>                   | oxysterol                                                         | LXR ligand,<br>ER ligand   |                            | [127, 131]                  |
| <b>Dendrogenin A</b>         | conjugation of 5,6 $\alpha$ -epoxy-<br>cholesterol with histamine | LXR ligand                 |                            | [132, 133]                  |
| <b>Desmosterol</b>           | cholesterol precursor                                             | LXR ligand                 | putative ER ligand         | [134, 135]                  |
| <b>GW3965</b>                | synthetic LXR agonist                                             | LXR ligand                 |                            | [133]                       |
| <b>T091317</b>               | synthetic LXR agonist                                             | LXR ligand                 |                            | [125, 133]                  |



## Supplemental Figure Legends:

**Supplemental Figure 1. 27HC-treated macrophages suppress T cell expansion.** (A) Representative histograms from flow cytometry. CD3<sup>+</sup> T cells were isolated from the spleen of OT-1 mice, stained with CFSE, were co-cultured with BMDMs treated with OVA<sub>257-264</sub> and either vehicle- or 27HC. 72hrs after co-culture, T cells were harvested for flow cytometry analysis. This data is from Fig. 3E, and is also representative of **Figs. 2D&E**. (B) Naïve T cells were isolated from the spleen of wildtype C57BL/6 mouse, chemically activated and cultured in the presence of conditioned media harvested from vehicle- or 27HC-treated BMDMs. 72hrs after co-culture, T cells were harvested for flow cytometry analysis. Data are presented as mean ± SEM and asterisks (\*) indicate statistical significance from the vehicle control (N=3/group for T cell only control, N=6/group for conditioned media two-tailed t-test,  $p < 0.05$ ). (C). CD3<sup>+</sup> T cells were isolated from the spleen of wildtype C57BL/6 mice, labeled with CFSE, chemically activated and cultured with conditioned media harvested from vehicle- or 27HC-treated BMDMs. 72hrs after co-culture, T cells were harvested for flow cytometry analysis. Data are presented as mean ± SEM and asterisks (\*) indicate statistical significance from the respective vehicle control (N=3/group for T cell only controls, for conditioned-media conditions, N=5-6/group). (two-tailed t-test,  $p < 0.05$ ). This subfigure is an independent repeat of **Fig. 11**.

**Supplemental Figure 2. Blockade of MHCII does not attenuate pro-colonizing effects of 27HC.** Mice were pretreated with placebo or 27HC (20mg/kg/d) for 5d, as in [23]. 36h and 12h prior to cell graft, mice were injected (i.p) with an isotype control antibody (IgG) or an antibody against murine I-A/I-E. Mice were then grafted with Met1 cells expressing iRFP. Resulting cancer colonies within the lung were quantified by *ex vivo* imaging for iRFP fluorescence. Different letters denote statistical significance, N=8/group. (one-way ANOVA followed by Neuman-Kuels multiple comparison test,  $p < 0.05$ ).

**Supplemental Figure 3. Expression of granzyme B (GZMB) and perforin (PRF1) normalized to CD8A expression was modestly but significantly correlated with CYP7B1 expression.** mRNA expressions from Human RNA sequencing data from TCGA Pan Cancer for invasive breast carcinoma were log<sub>2</sub> transformed and Pearson's correlation was assessed (N=1077 in (A) and 1081 in (B)). These data partner with **Fig. 3L and M**.

**Supplemental Figure 4. Cholesterol efflux from macrophages unlikely to mediate the suppressive effect of 27HC on T cells.** CD3<sup>+</sup> T cells were isolated from wildtype C57BL/6 or LDLR<sup>-/-</sup> mice, labeled with CFSE and chemically activated. They were then co-cultured with vehicle- or 27HC-treated BMDMs. 72hrs after co-culture, T cells were harvested for flow cytometry analysis. Data are presented as mean ± SEM and asterisks (\*) indicate statistical significance from the respective vehicle control (N=3/group for all T cell only controls, for co-culture conditions, N=5/group). (two-tailed t-test,  $p < 0.05$ ).

**Supplemental Figure 5. ELISA analysis of TGFβ after macrophages were treated with LPS and either vehicle or 27HC.** BMDMs were treated with LPS and either vehicle or 27HC for 24hrs. Conditioned media was harvested and TGFβ was quantified by ELISA (R&D, DY1679-05).

**Supplemental Figure 6. Previously reported pathways involved in myeloid cell suppression of T cells (PI3K, AKT, NOTCH and CaMKK2) were ruled out from the suppressive mechanism of 27HC-treated macrophages.** BMDMs were treated with vehicle ± indicated inhibitors or 27HC ± indicated inhibitors for 24hrs. CD3<sup>+</sup> T cells were then isolated from wildtype C57BL/6 mouse, labeled with CFSE and chemically activated at the time of co-culture with pre-treated BMDMs. 72hrs after co-culture, T cells were harvested for flow cytometry analysis. Data are presented as mean ± SEM and asterisks (\*) indicate statistical significance from the respective vehicle control (N=3/group for all T cell only controls, for co-culture conditions, N=3-4/group). (two-tailed t-test,  $p < 0.05$ ).

**Supplemental Figure 7. Estrogenic activity of 13 ligands.** T47D cells stably expressing a ERE luciferase reporter were treated with indicated compounds and the activation of ER was measured by luciferase activity. Data are presented as mean ± SEM (N=4/treatment).

**Supplemental Figure 8. LXR-activating activity of 12 cholesterol metabolites, synthetic LXR ligands and E2.** BMDMs were treated with indicated compounds and mRNA expression of (**top**) ABCA1 (N=3/group for all

cholesterol metabolites and synthetic LXR ligands, N=5 or 6/group for E2) and **(bottom)** ABCG1 (N=3/group), were quantified by qPCR. Data are presented as mean  $\pm$  SEM relative to the respective vehicle control.

**Supplemental Figure 9. Knockdown or inhibition of LXR isoforms attenuates immunosuppressive effects of 27HC and the synthetic LXR agonist, GW3965** **(A)** Representative LXR $\alpha$  and  $\beta$  expression after siRNA knockdown for 48hrs as measured by qPCR (N=3/group; This corresponds with **Fig. 5G**). **(B)** LXR $\alpha$  and  $\beta$  expression after lentivirus-delivered shRNA knockdown for 96hrs as measured by qPCR (N=2/group; this corresponds with **Fig. 5H**). **(C)** T cell proliferation was restored with the LXR antagonist, GSK2033. After 24hrs, the treatments were washed off and treated BMDMs were co-cultured with chemically activated wildtype T cells for 72hrs. T cells were labeled with CFSE and proliferation measured by flow cytometry (N=3/group for T cell only controls, for co-culture conditions, N=4/group). Data are presented as mean  $\pm$  SEM and asterisks (\*) indicate statistical significance from the respective vehicle control. (two-tailed t-test,  $p < 0.05$ ). This corresponds with **Fig. 5I**.

**Supplemental Figure 10. 27HC-treated macrophages induce T cell apoptosis.** **(A)** Representative flow cytometry dot plots of **Fig. 6B** (48hrs), where T cells were harvested and labeled with Annexin V and PI, after co-culture with vehicle- (top) or 27HC-treated BMDMs (bottom) for 48hrs. **(B)** Representative flow cytometry dot plots of **Fig. 6C** (48hrs), where T cells were harvested and labeled with FLICA-FAM and PI, after co-culture with vehicle- (top) or 27HC-treated BMDMs (bottom) for 48hrs.

**Supplemental Figure 11. CYP27A1<sup>fl/fl</sup>;LysMCre<sup>+</sup> mice do not express CYP27A1 in bone marrow-derived macrophages.** Tissues were harvested from 3 separate CYP27A1<sup>fl/fl</sup>;LysMCre<sup>+</sup> and 3 CYP27A1<sup>+/+</sup>;LysMCre<sup>+</sup> (control) male mice. Tissue was harvested from a traditional (global) CYP27A1<sup>-/-</sup> mouse as a control. Bone marrow was harvested and used to derive macrophages. **(A)** Genotyping analysis indicating presence of floxed alleles in the CYP27A1 gene (smaller PCR amplicon). **(B)** Protein was extracted in RIPA buffer and run on SDS-page for Western analysis using anti-CYP27A1 (Abcam 126785) or cyclophilin B (Cyp B; Santa Cruz Biotechnology sc-517566) as an internal control. As can be noted, CYP27A1 was not expressed in macrophages, but continued to be expressed in the liver, spleen and lungs of CYP27A1<sup>fl/fl</sup>;LysMCre<sup>+</sup> mice.

**Supplemental Figure 12. Absence of myeloid CYP27A1 decreased tumor growth post T-cell graft.** Mice with myeloid cell knockout of CYP27A1 (CYP27A1<sup>fl/fl</sup>;LysMCre<sup>+</sup>) exhibited lower level of antigen-specific primary tumor growth. CYP27A1<sup>fl/fl</sup>;LysMCre<sup>+</sup> mice (N=8) and their replete controls (N=7) were grafted orthotopically with E0771-OVA cells and tumors allowed to grow to  $\sim 200$  mm<sup>3</sup>. Control (CYP27A1<sup>+/+</sup>;LysMCre<sup>+</sup>) mice received an adoptive transfer of CD3<sup>+</sup> T cells isolated from OT-I mice 12 days post-cancer graft (first dashed line), and CYP27A1<sup>fl/fl</sup>;LysMCre<sup>+</sup> mice received an adoptive transfer of CD3<sup>+</sup> T cells isolated from OT-I mice 13 days post-cancer graft. Control and CYP27A1<sup>fl/fl</sup>;LysMCre<sup>+</sup> mice were euthanized 25 days after initial cancer cell graft respectively. **(A)** Tumor volumes were measured through time by digital calipers and plotted as mean  $\pm$  SEM. Two way ANOVA followed by Sidak's multiple comparison test on data up to and including day 25 found a statistically significant difference between the groups on day 25 ( $p < 0.05$ , denoted by asterisk). **(B)** Growth of tumors post T cell transfer. This is the same data from **(A)**, but adjusted for time post T cell transfer. Data were then fit to a curve with non-linear regression (four parameter variable slope). This corresponds with **Fig. 7A**.

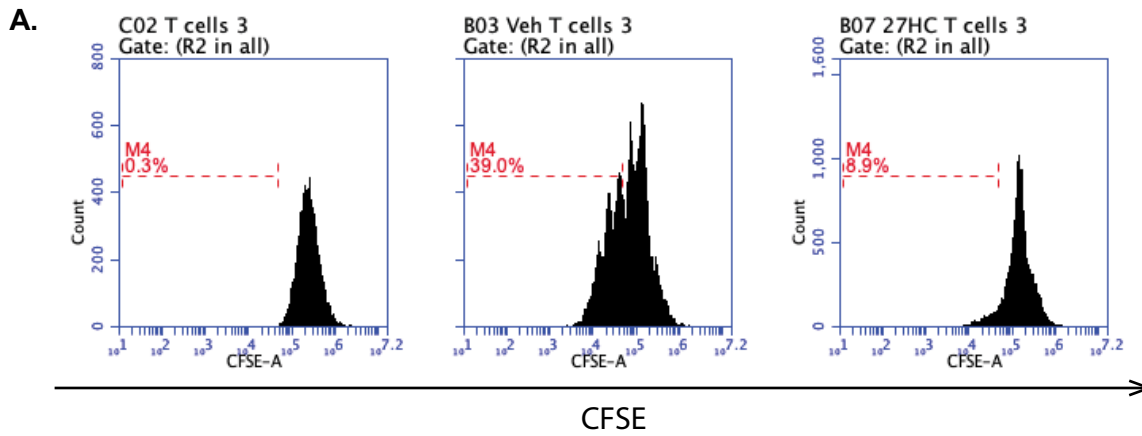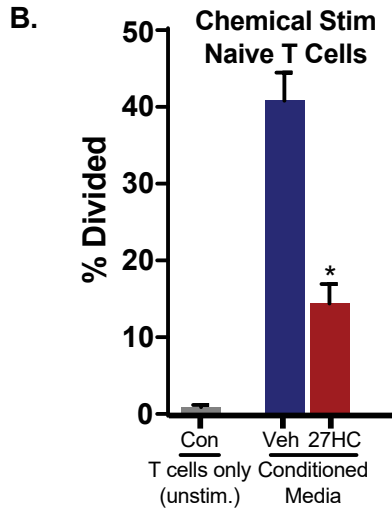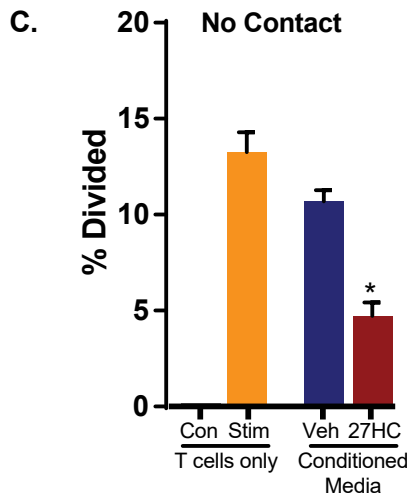

**Supplemental Figure 1. 27HC-treated macrophages suppress T cell expansion. (A)** Representative histograms from flow cytometry. CD3<sup>+</sup> T cells were isolated from the spleen of OT-1 mice, stained with CFSE, were co-cultured with BMDMs treated with OVA<sub>257-264</sub> and either vehicle- or 27HC. 72hrs after co-culture, T cells were harvested for flow cytometry analysis. This data is from Fig. 3E, and is also representative of **Figs. 2D&E**. **(B)** Naïve T cells were isolated from the spleen of wildtype C57BL/6 mouse, chemically activated and cultured in the presence of conditioned media harvested from vehicle- or 27HC-treated BMDMs. 72hrs after co-culture, T cells were harvested for flow cytometry analysis. Data are presented as mean ± SEM and asterisks (\*) indicate statistical significance from the vehicle control (N=3/group for T cell only control, N=6/group for conditioned media two-tailed t-test, p < 0.05). **(C)**. CD3<sup>+</sup> T cells were isolated from the spleen of wildtype C57BL/6 mice, labeled with CFSE, chemically activated and cultured with conditioned media harvested from vehicle- or 27HC-treated BMDMs. 72hrs after co-culture, T cells were harvested for flow cytometry analysis. Data are presented as mean ± SEM and asterisks (\*) indicate statistical significance from the respective vehicle control (N=3/group for T cell only controls, for conditioned-media conditions, N=5-6/group). (two-tailed t-test, p < 0.05). This sub-figure is an independent repeat of **Fig. 11**.

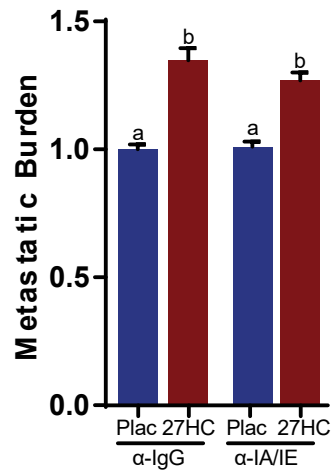

**Supplemental Figure 2. Blockade of MHCII does not attenuate pro-colonizing effects of 27HC.** Mice were pretreated with placebo or 27HC (20mg/kg/d) for 5d, as in [23]. 36h and 12h prior to cell graft, mice were injected (i.p) with an isotype control antibody (IgG) or an antibody against murine I-A/I-E. Mice were then grafted with Met1 cells expressing iRFP. Resulting cancer colonies within the lung were quantified by *ex vivo* imaging for iRFP fluorescence. Different letters denote statistical significance, N=8/group. (one-way ANOVA followed by Neuman-Kuels multiple comparison test,  $p < 0.05$ ).

### A. GZMB/CD8A

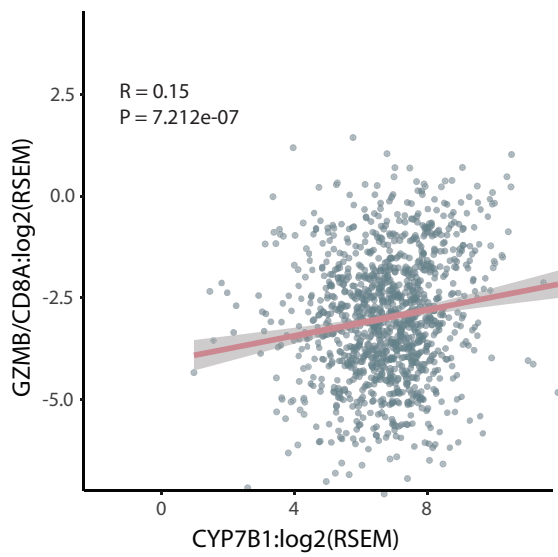

### B. PRF1/CD8A

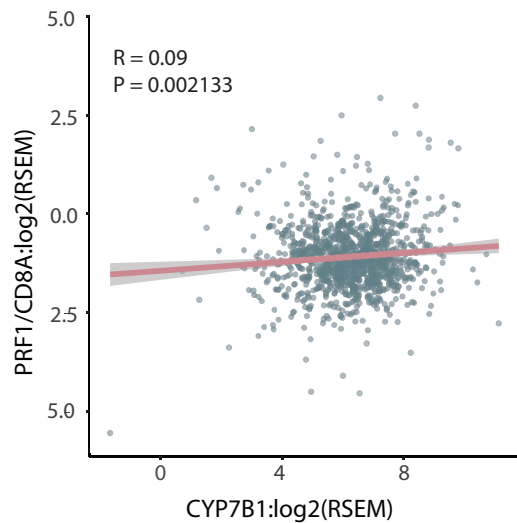

**Supplemental Figure 3. Expression of granzyme B (GZMB) and perforin (PRF1) normalized to CD8A expression was modestly but significantly correlated with CYP7B1 expression.** mRNA expressions from Human RNA sequencing data from TCGA Pan Cancer for invasive breast carcinoma were log2 transformed and Pearson's correlation was assessed (N=1077 in (A) and 1081 in (B)). These data partner with **Fig. 3L and M**.

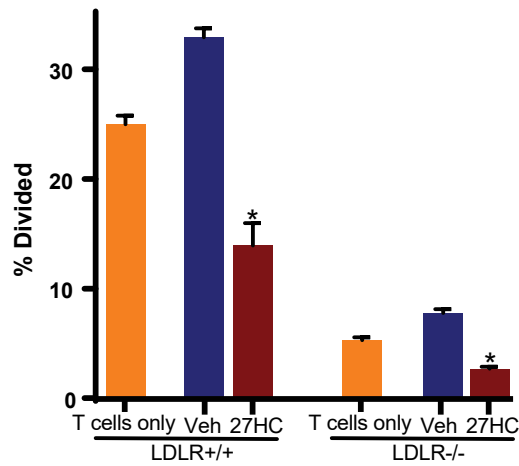

**Supplemental Figure 4. Cholesterol efflux from macrophages unlikely to mediate the suppressive effect of 27HC on T cells.** CD3<sup>+</sup> T cells were isolated from wildtype C57BL/6 or LDLR<sup>-/-</sup> mice, labeled with CFSE and chemically activated. They were then co-cultured with vehicle- or 27HC-treated BMDMs. 72hrs after co-culture, T cells were harvested for flow cytometry analysis. Data are presented as mean  $\pm$  SEM and asterisks (\*) indicate statistical significance from the respective vehicle control (N=3/group for all T cell only controls, for co-culture conditions, N=5/group). (two-tailed t-test,  $p < 0.05$ ).

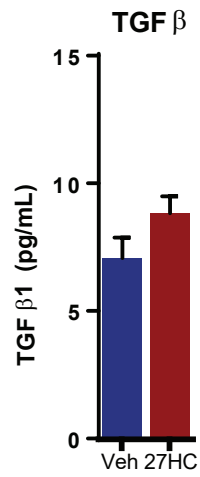

**Supplemental Figure 5. ELISA analysis of TGFβ after macrophages were treated with LPS and either vehicle or 27HC.** BMDMs were treated with LPS and either vehicle or 27HC for 24hrs. Conditioned media was harvested and TGFβ was quantified by ELISA (R&D, DY1679-05).

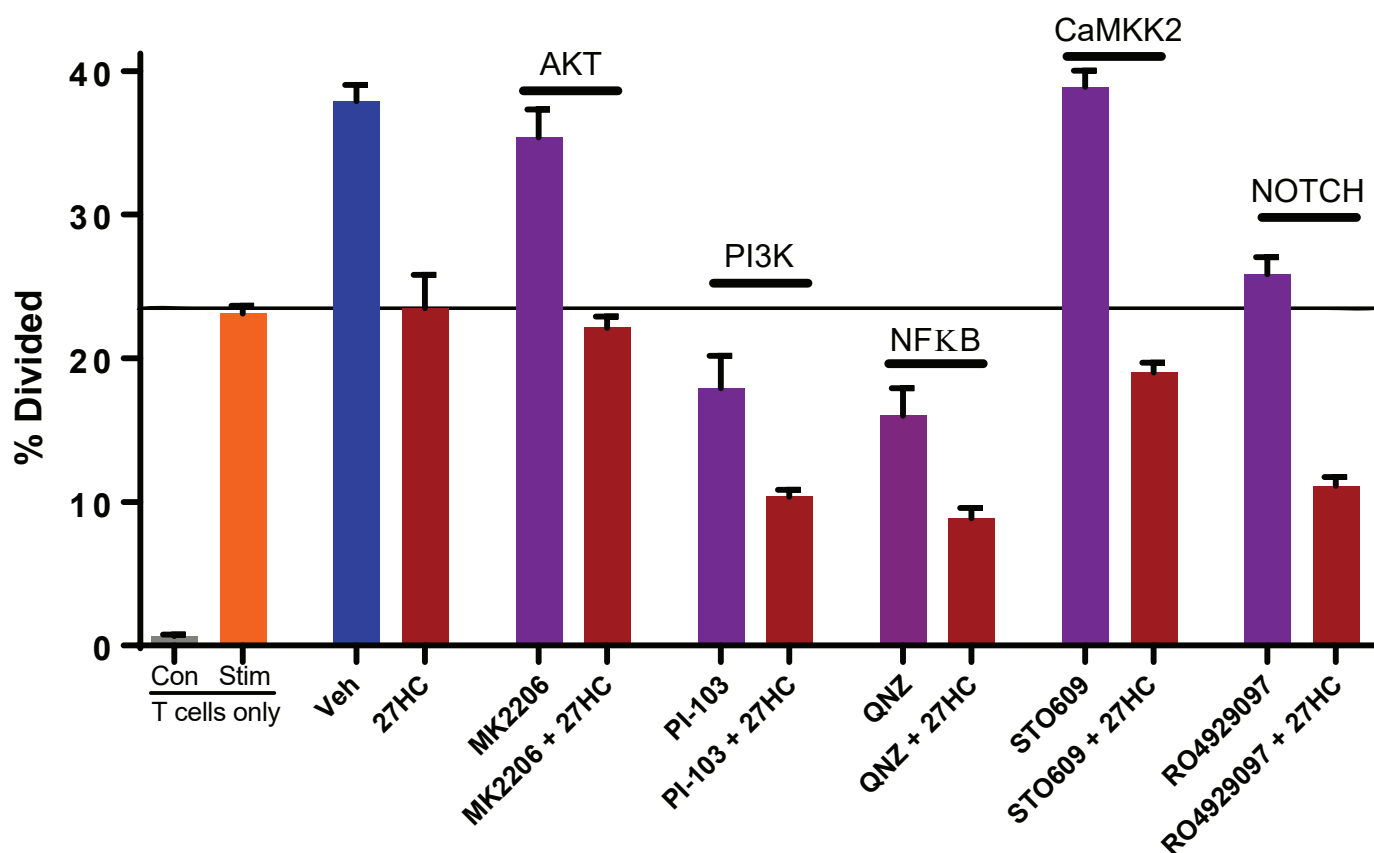

**Supplemental Figure 6. Previously reported pathways involved in myeloid cell suppression of T cells (PI3K, AKT, NOTCH and CaMKK2) were ruled out from the suppressive mechanism of 27HC-treated macrophages.** BMDMs were treated with vehicle  $\pm$  indicated inhibitors or 27HC  $\pm$  indicated inhibitors for 24hrs. CD3<sup>+</sup> T cells were then isolated from wildtype C57BL/6 mouse, labeled with CFSE and chemically activated at the time of co-culture with pre-treated BMDMs. 72hrs after co-culture, T cells were harvested for flow cytometry analysis. Data are presented as mean  $\pm$  SEM and asterisks (\*) indicate statistical significance from the respective vehicle control (N=3/group for all T cell only controls, for co-culture conditions, N=3-4/group). (two-tailed t-test,  $p < 0.05$ ).



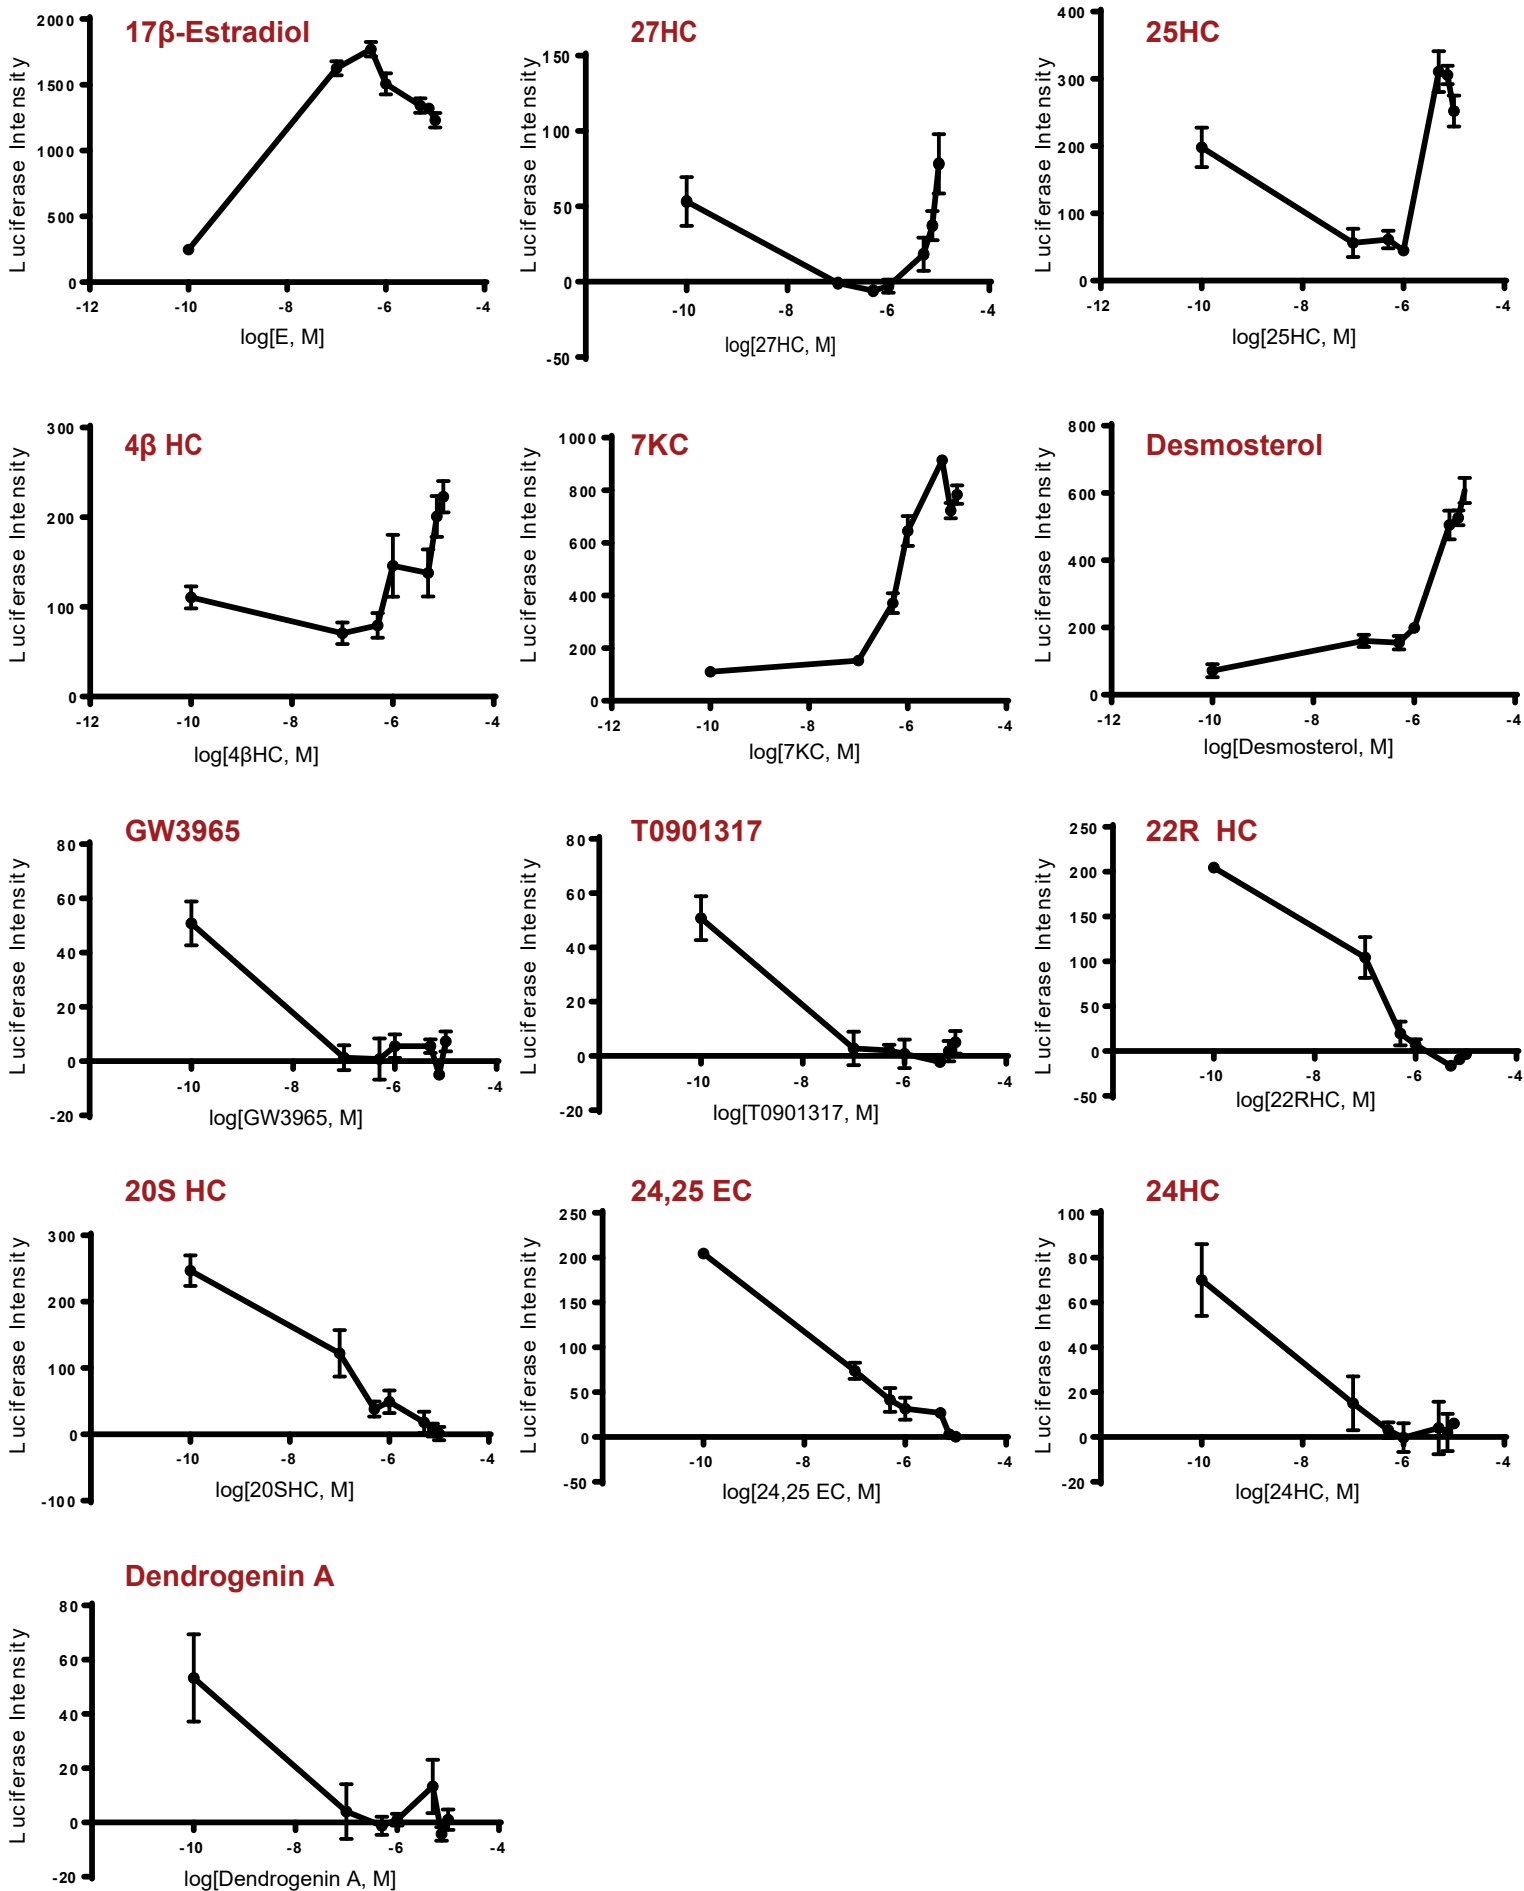

**Supplemental Figure 7. Estrogenic activity of 13 ligands.** T47D cells stably expressing a ERE luciferase reporter were treated with indicated compounds and the activation of ER was measured by luciferase activity. Data are presented as mean  $\pm$  SEM (N=4/treatment).

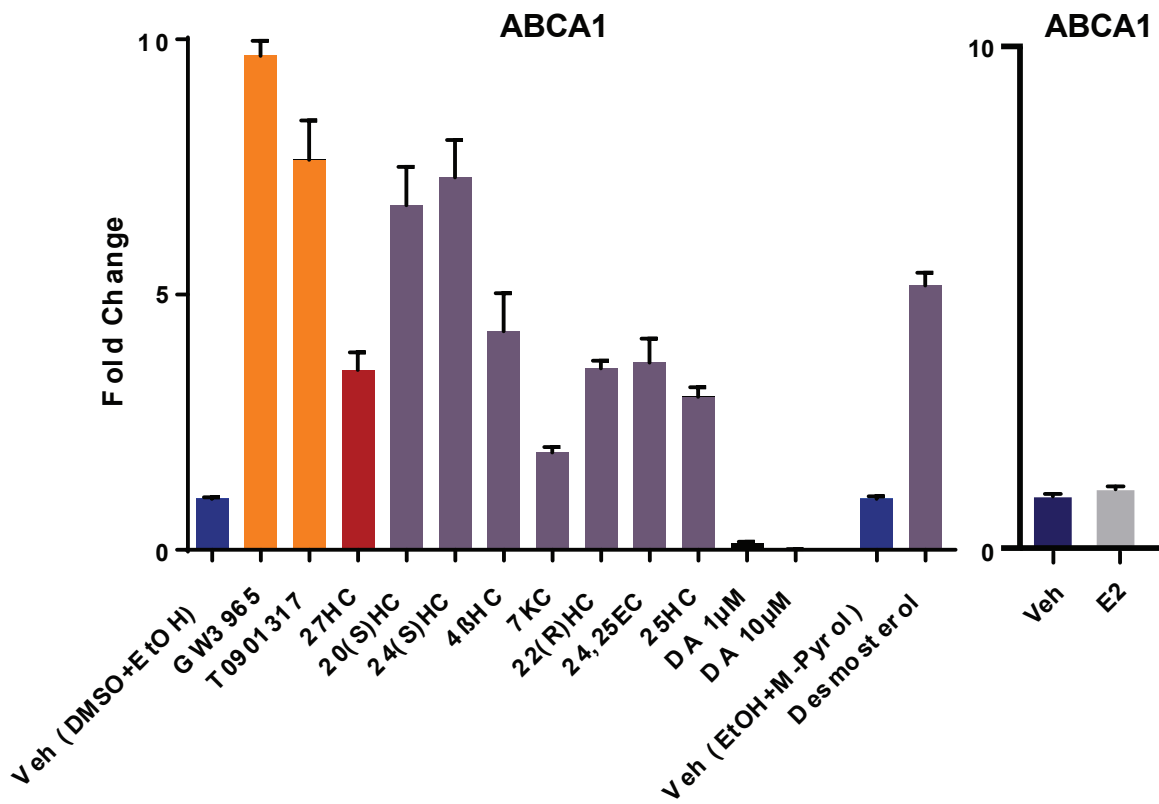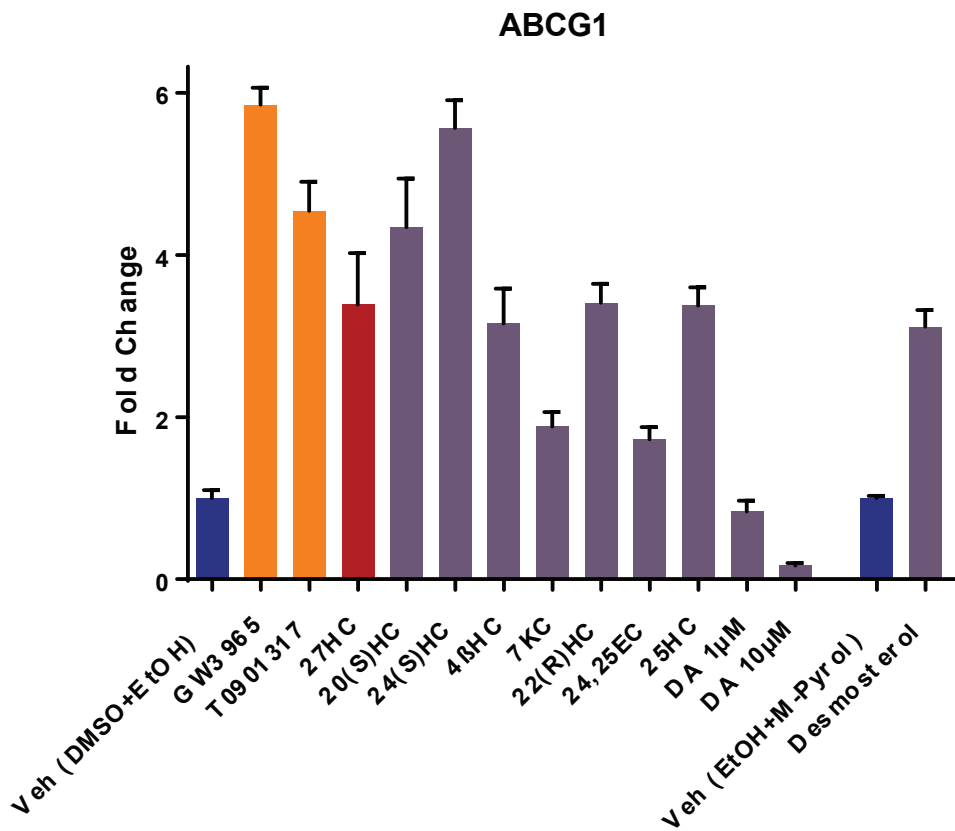

**Supplemental Figure 8. LXR-activating activity of 12 cholesterol metabolites, synthetic LXR ligands and E2.** BMDMs were treated with indicated compounds and mRNA expression of **(top)** ABCA1 (N=3/group for all cholesterol metabolites and synthetic LXR ligands, N=5 or 6/group for E2) and **(bottom)** ABCG1 (N=3/group), were quantified by qPCR. Data are presented as mean  $\pm$  SEM relative to the respective vehicle control.

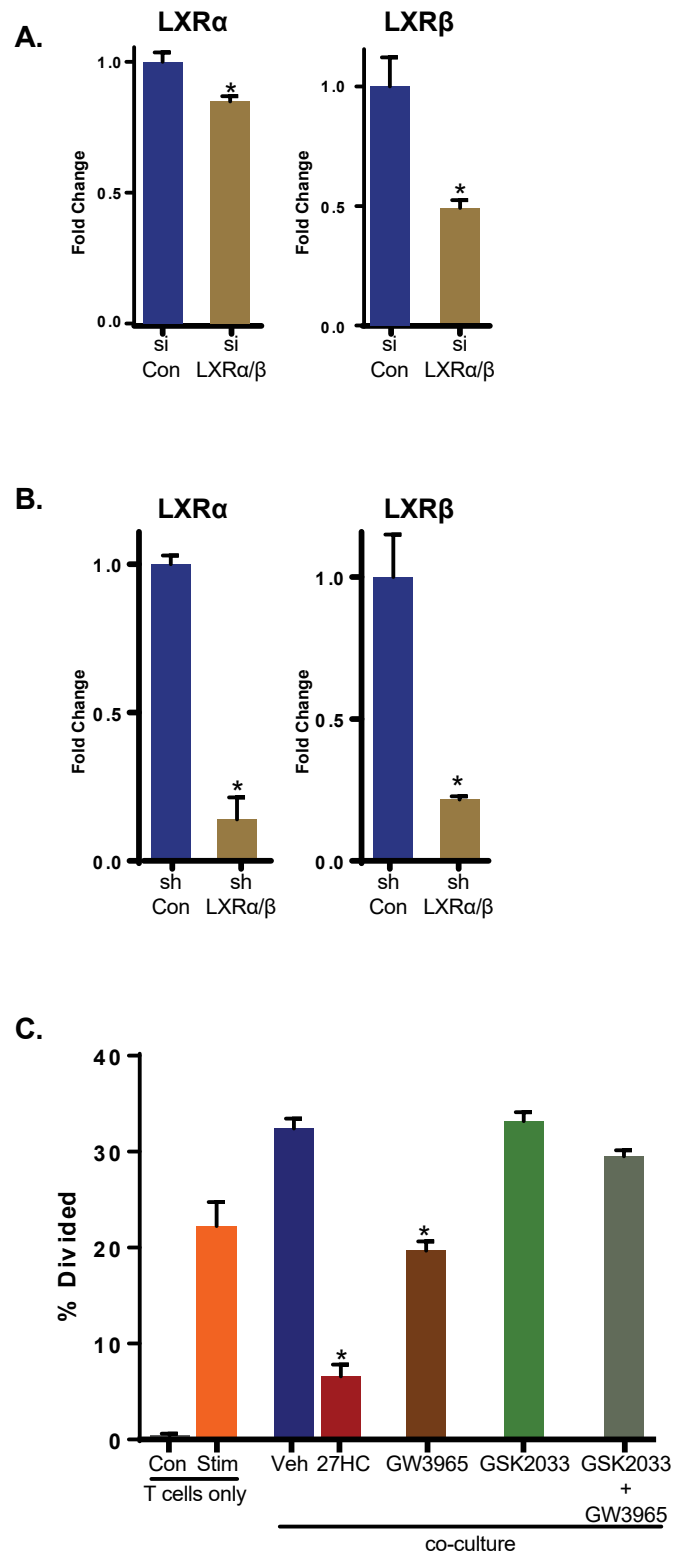

**Supplemental Figure 9. Knockdown or inhibition of LXR isoforms attenuates immunosuppressive effects of 27HC and the synthetic LXR agonist, GW3965 (A)** Representative LXR $\alpha$  and  $\beta$  expression after siRNA knockdown for 48hrs as measured by qPCR (N=3/group; This corresponds with **Fig. 5G**). **(B)** LXR $\alpha$  and  $\beta$  expression after lentivirus-delivered shRNA knockdown for 96hrs as measured by qPCR (N=2/group; this corresponds with **Fig. 5H**). **(C)** T cell proliferation was restored with the LXR antagonist, GSK2033. After 24hrs, the treatments were washed off and treated BMDMs were co-cultured with chemically activated wildtype T cells for 72hrs. T cells were labeled with CFSE and proliferation measured by flow cytometry (N=3/group for T cell only controls, for co-culture conditions, N=4/group). Data are presented as mean  $\pm$  SEM and asterisks (\*) indicate statistical significance from the respective vehicle control. (two-tailed t-test,  $p < 0.05$ ). This corresponds with **Fig. 5I**.

A.

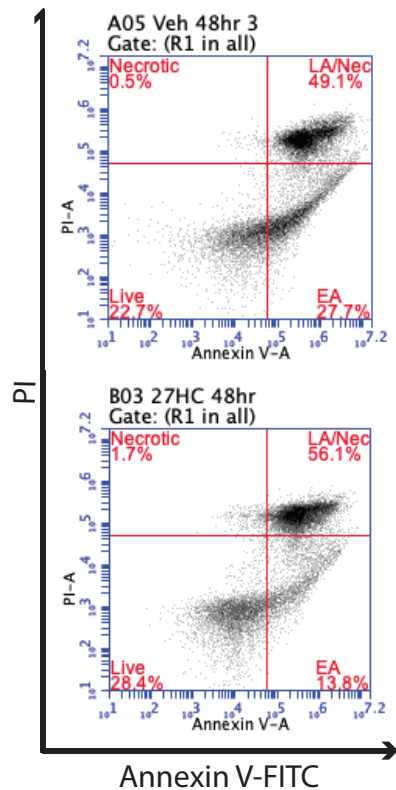

B.

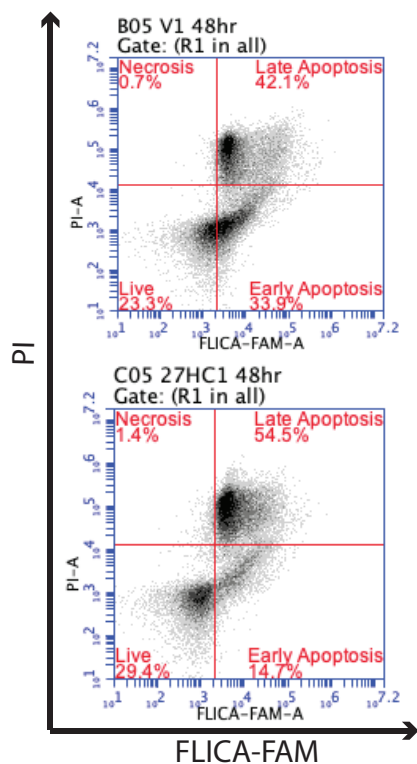

**Supplemental Figure 10. 27HC-treated macrophages induce T cell apoptosis. (A)** Representative flow cytometry dot plots of **Fig. 6B** (48hrs), where T cells were harvested and labeled with Annexin V and PI, after co-culture with vehicle- (top) or 27HC-treated BMDMs (bottom) for 48hrs. **(B)** Representative flow cytometry dot plots of **Fig. 6C** (48hrs), where T cells were harvested and labeled with FLICA-FAM and PI, after co-culture with vehicle- (top) or 27HC-treated BMDMs (bottom) for 48hrs.

## DNA Genotyping:

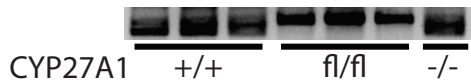

## Protein by Western Analysis

### Liver

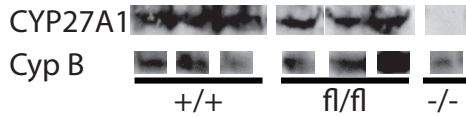

### Spleen

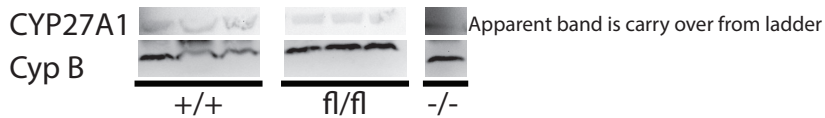

### Lung

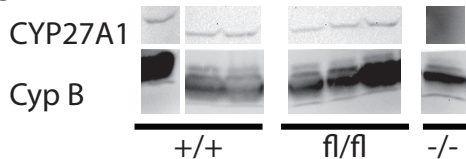

### Macrophages

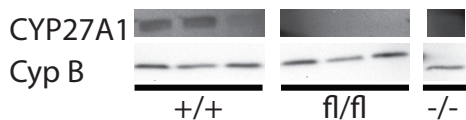

**Supplemental Figure 11. CYP27A1<sup>fl/fl</sup>;LysMCre<sup>+</sup> mice do not express CYP27A1 in bone marrow-derived macrophages.** Tissues were harvested from 3 separate CYP27A1<sup>fl/fl</sup>;LysMCre<sup>+</sup> and 3 CYP27A1<sup>+/+</sup>;LysMCre<sup>+</sup> (control) male mice. Tissue was harvested from a traditional (global) CYP27A1<sup>-/-</sup> mouse as a control. Bone marrow was harvested and used to derive macrophages. **(A)** Genotyping analysis indicating presence of floxed alleles in the CYP27A1 gene (smaller PCR amplicon). **(B)** Protein was extracted in RIPA buffer and run on SDS-page for Western analysis using anti-CYP27A1 (Abcam 126785) or cyclophilin B (Cyp B; Santa Cruz Biotechnology sc-517566) as an internal control. As can be noted, CYP27A1 was not expressed in macrophages, but continued to be expressed in the liver, spleen and lungs of CYP27A1<sup>fl/fl</sup>;LysMCre<sup>+</sup> mice.

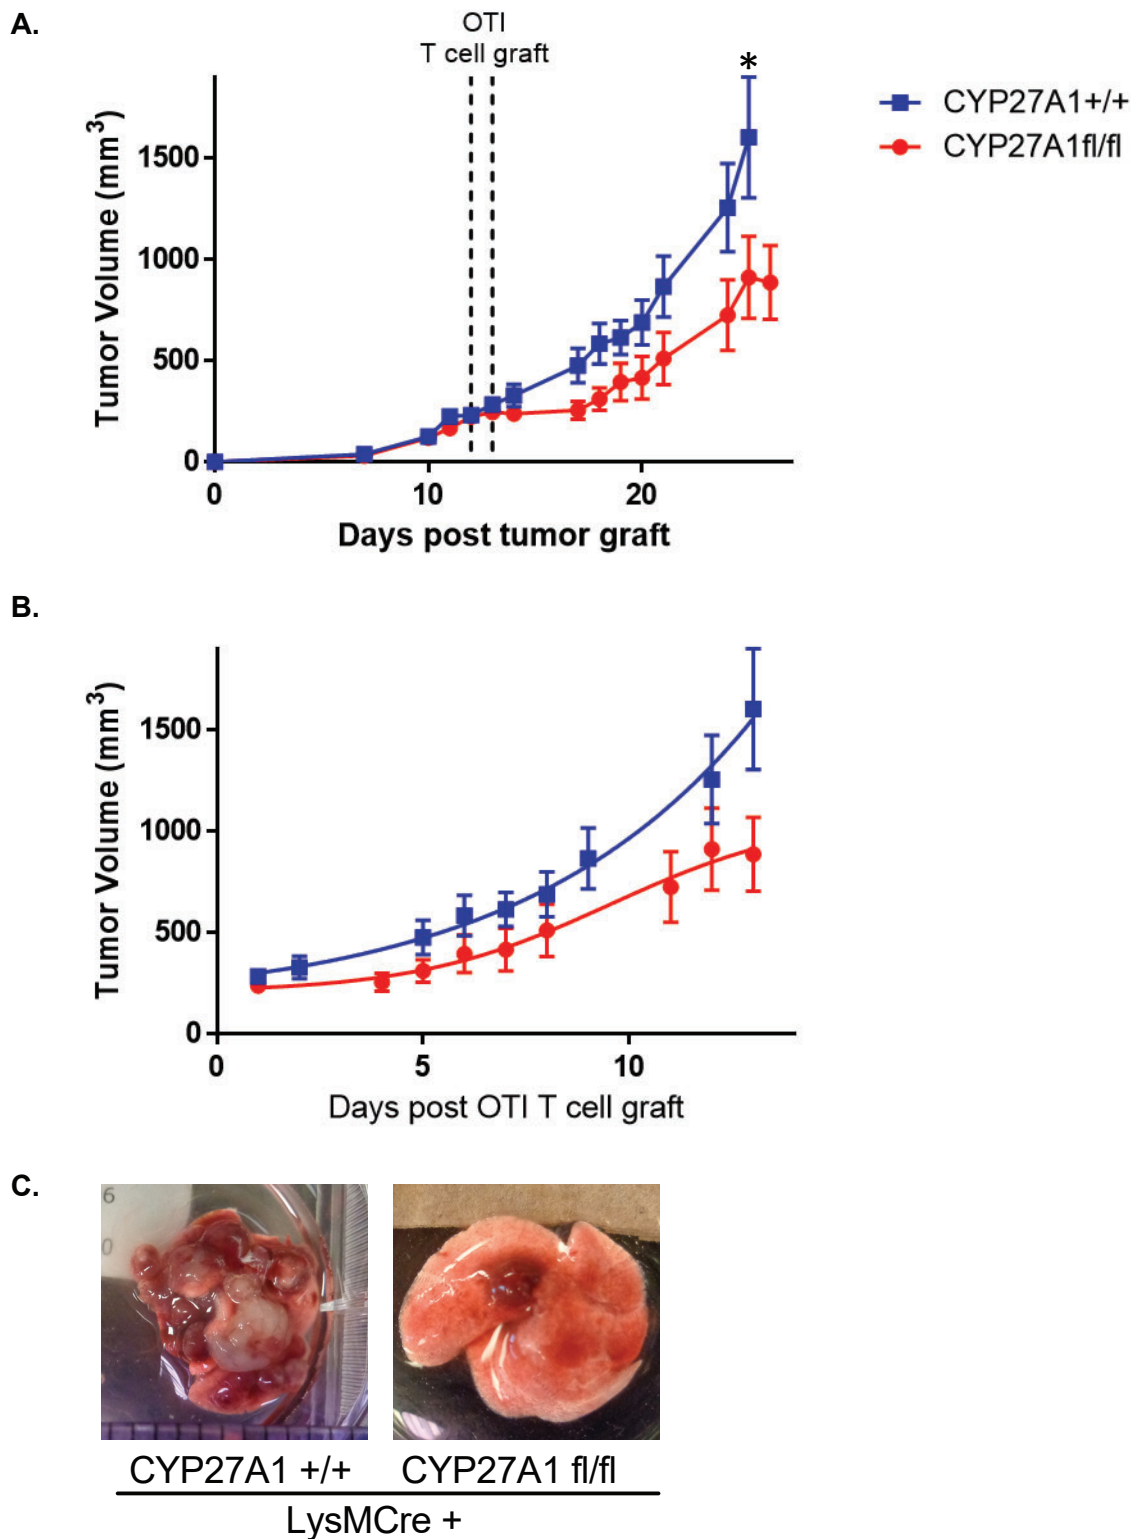

**Supplemental Figure 12. Absence of myeloid CYP27A1 decreased tumor growth post T-cell graft.** Mice with myeloid cell knockout of CYP27A1 (CYP27A1<sup>fl/fl</sup>;LysMCre<sup>+</sup>) exhibited lower level of antigen-specific primary tumor growth. CYP27A1<sup>fl/fl</sup>;LysMCre<sup>+</sup> mice (N=8) and their replete controls (N=7) were grafted orthotopically with E0771-OVA cells and tumors allowed to grow to ~200 mm<sup>3</sup>. Control (CYP27A1<sup>+/+</sup>;LysMCre<sup>+</sup>) mice received an adoptive transfer of CD3<sup>+</sup> T cells isolated from OT-I mice 12 days post-cancer graft (first dashed line), and CYP27A1<sup>fl/fl</sup>;LysMCre<sup>+</sup> mice received an adoptive transfer of CD3<sup>+</sup> T cells isolated from OT-I mice 13 days post-cancer graft. Control and CYP27A1<sup>fl/fl</sup>;LysMCre<sup>+</sup> mice were euthanized 25 days after initial cancer cell graft respectively. **(A)** Tumor volumes were measured through time by digital calipers and plotted as mean  $\pm$  SEM. Two way ANOVA followed by Sidak's multiple comparison test on data up to and including day 25 found a statistically significant difference between the groups on day 25 ( $p < 0.05$ , denoted by asterisk). **(B)** Growth of tumors post T cell transfer. This is the same data from **(A)**, but adjusted for time post T cell transfer. Data were then fit to a curve with non-linear regression (four parameter variable slope). This corresponds with **Fig. 7A**.
